# Supplementary material for: The C-terminal dimerization domain of the respiratory mucin MUC5B functions in mucin stability and intracellular packaging before secretion
Source: PubMed Central journal article supplement (PMC6851316; doi:10.1074/jbc.ra119.010771), 2019-09-30
Supplement: supp_RA119.010771_155406_1_supp_398201_py3c5p.pdf [file supp_RA119.010771_155406_1_supp_398201_py3c5p.pdf]

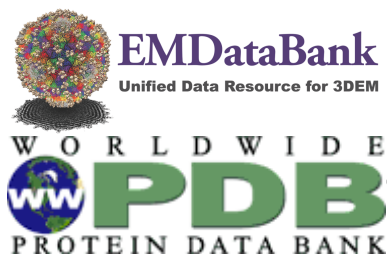

## Full wwPDB/EMDataBank EM Map Validation Report ⓘ

Aug 28, 2019 – 12:45 pm BST

EMDB ID: : EMD-10264  
Title : Respiratory mucin MUC5B; C-terminal dimerization domain structure  
Deposited on : 2019-08-28  
Resolution : 10.00 Å(reported)

This is a Full wwPDB/EMDataBank EM Map Validation Report.

This report is produced by the wwPDB biocuration pipeline after annotation of the structure.

We welcome your comments at [validation@mail.wwpdb.org](mailto:validation@mail.wwpdb.org)

A user guide is available at

<https://www.wwpdb.org/validation//EmDataBankMapValidationReportHelp>

with specific help available everywhere you see the ⓘ symbol.

# 1 Experimental information [i](#)

| Property                             | Value                     | Source    |
|--------------------------------------|---------------------------|-----------|
| Reconstruction method                | SINGLE PARTICLE           | Depositor |
| Imposed symmetry                     | POINT, C1                 | Depositor |
| Number of particles used             | 16590                     | Depositor |
| Resolution determination method      | FSC 0.143 CUT-OFF         | Depositor |
| CTF correction method                | NONE                      | Depositor |
| Microscope                           | FEI TITAN KRIOS           | Depositor |
| Voltage (kV)                         | 300                       | Depositor |
| Electron dose ( $e^-/\text{\AA}^2$ ) | 40                        | Depositor |
| Minimum defocus (nm)                 | Not provided              | Depositor |
| Maximum defocus (nm)                 | Not provided              | Depositor |
| Magnification                        | Not provided              | Depositor |
| Image detector                       | GATAN K2 SUMMIT (4k x 4k) | Depositor |
