# Supplementary material for: The C-terminal dimerization domain of the respiratory mucin MUC5B functions in mucin stability and intracellular packaging before secretion
Source: PubMed Central journal article supplement (PMC6851316; doi:10.1074/jbc.ra119.010771), 2019-09-30
Supplement: supp_RA119.010771_155406_1_supp_401563_pyfylf.pdf [file supp_RA119.010771_155406_1_supp_401563_pyfylf.pdf]

## SUPPLEMENTARY MATERIAL

The C-terminal dimerization domain of the respiratory mucin MUC5B functions in mucin stability and intracellular packaging before secretion

**\*Caroline Ridley<sup>1,3,5</sup>, \*Michael P Lockhart-Cairns<sup>1,4,5</sup>, Richard F Collins<sup>5</sup>, Thomas A Jowitt<sup>1,5</sup>, Durai B Subramani<sup>6</sup>, Mehmet Kesimer<sup>6</sup>, Clair Baldock<sup>1,4,5#</sup>, and David J Thornton<sup>1,2,3,5#</sup>**

\*Joint first authors

<sup>1</sup>Wellcome Trust Centre for Cell-Matrix Research, <sup>2</sup>Lydia Becker Institute for Immunology and Inflammation, <sup>3</sup>Division of Infection Immunity and Respiratory Medicine, <sup>4</sup>Division of Cell-Matrix Biology and Regenerative Medicine, <sup>5</sup>School of Biological Sciences, Faculty of Biology, Medicine and Health, Manchester Academic Health Science Centre, The University of Manchester, Oxford Road, Manchester, M13 9PT, <sup>6</sup>Marsico Lung Institute/Cystic Fibrosis Research Center, University of North Carolina School of Medicine, Chapel Hill, NC, USA, 27599-7362.

Running title: *MUC5B structure, stability and interactions*

**#To whom correspondence: should be addressed:**

David J Thornton, Division of Infection Immunity and Respiratory Medicine, School of Biological Sciences, Faculty of Biology, Medicine and Health, The University of Manchester, Oxford Road, Manchester, M13 9PT; [dave.thornton@manchester.ac.uk](mailto:dave.thornton@manchester.ac.uk); Tel. +44 (0)161 275 5647.

Clair Baldock, Division of Cell-Matrix Biology and Regenerative Medicine, School of Biological Sciences, Faculty of Biology, Medicine and Health, The University of Manchester, Oxford Road, Manchester, M13 9PT; [clair.baldock@manchester.ac.uk](mailto:clair.baldock@manchester.ac.uk); Tel. +44 (0)161 275 5439

**Keywords:** Mucin, Mucus, Lung, Mucus obstruction, von Willebrand factor (vWF), mucociliary clearance, obstructive lung disease, hydrogel, secretory granule, cystic fibrosis

---

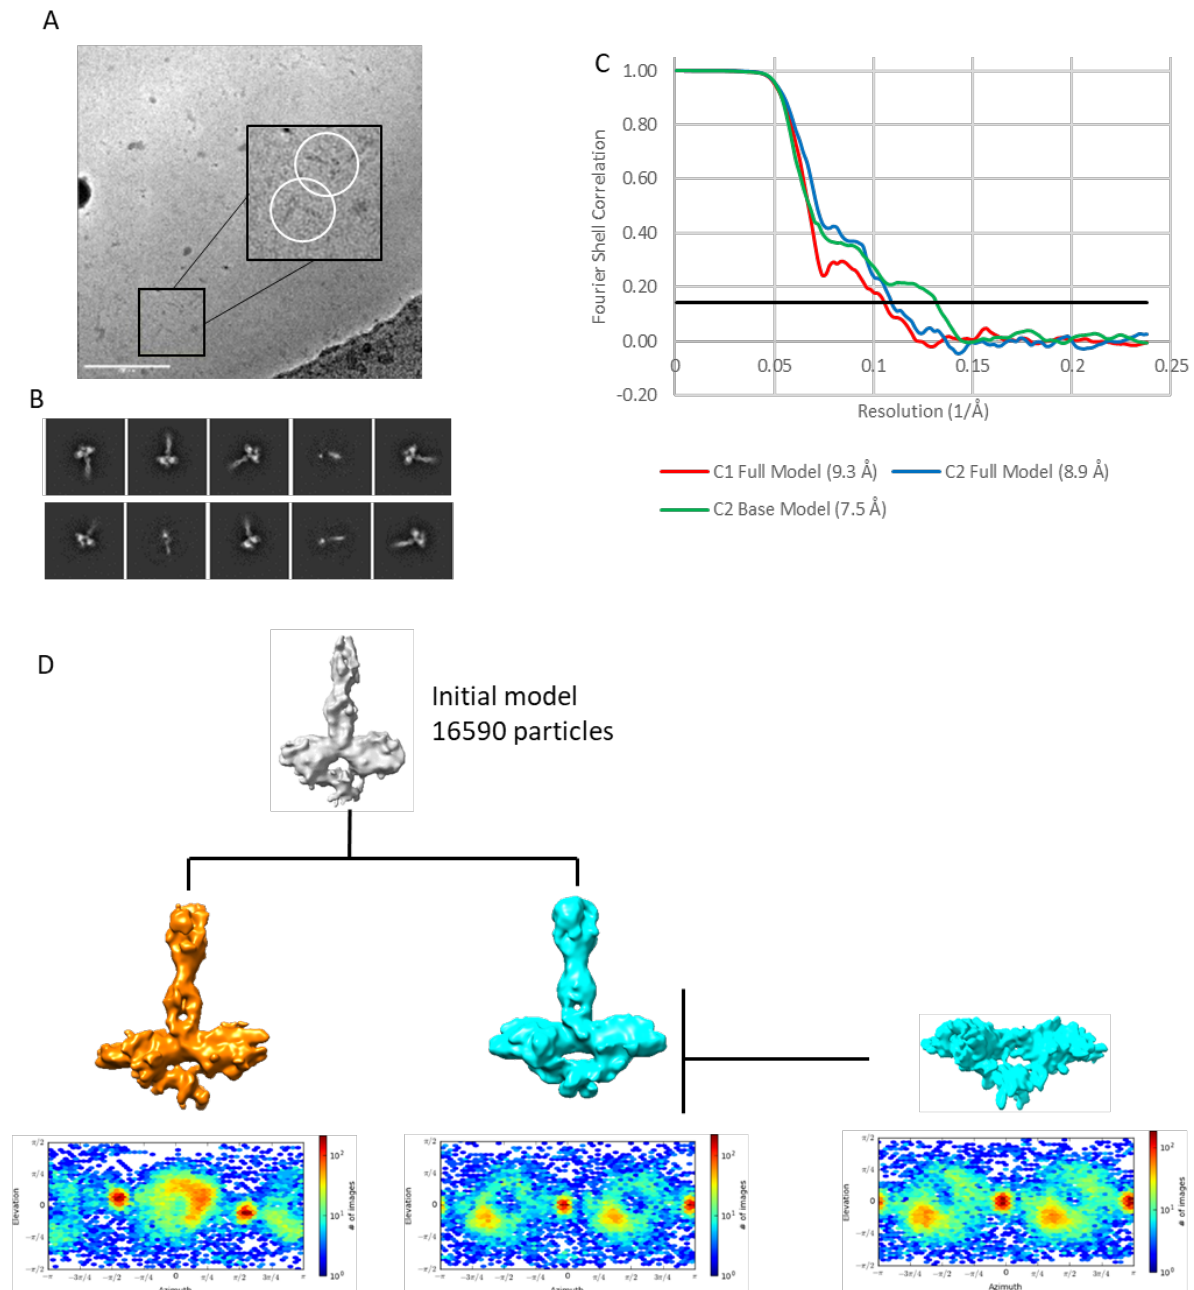

### Supplementary Figure 1: Schematic of CT5B single particle cryo-EM data processing

(A) A typical micrograph with an inset showing particle representations. Scale bar = 100 nm. (B) Representative reference-free 2D class averages, in 52 nm x 52 nm boxes, showing clearly the twist in the stalk of the protein and flexibility. (C) Fourier shell correlation of CT5B refined with C1 and C2 symmetries, and a local refine of a C2 symmetry base after particle subtraction. Resolution was calculated from the correlation between two independently refined halves of the data (gold-standard FSC). (D) Around 185000 particles were auto-picked from templates resulting from manually picked particles. Final classes containing 16590 particles were selected for further refinement. Refinement of the initial model was completed with a full mask, and with a mask around the base. Refinement of the full volume of CT5B resulted in a resolution

of 9.87 Å with some anisotropy due to particle orientation bias. The base of CT5B was refined to 7.5 Å and showed similar isotropy. The respective angular distribution of particles is shown below each of the reconstructions.

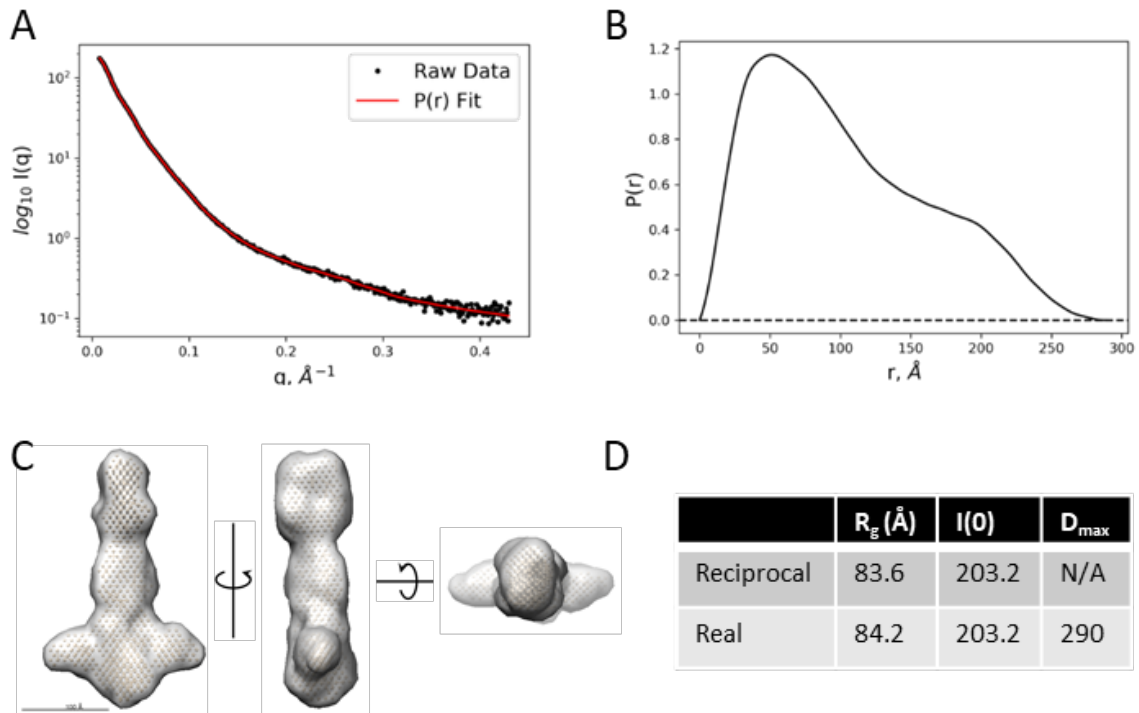

**Supplementary Figure 2: SAXS data of C-terminal MUC5B.**

(A) Scattering data of CT5B with the fit of the indirect Fourier Transform (IFT), from figure 1B, shown in red. (B) The IFT of the SAXS scattering data showing a maximum dimension of electron density at 309 Å and providing a real space  $R_g$  of 93.58 Å. (C) 3D reconstruction of CT5B structure showed an extended stem with double globular base. Scale bar = 100 Å. (D) Table showing structural parameters from reciprocal and real space.

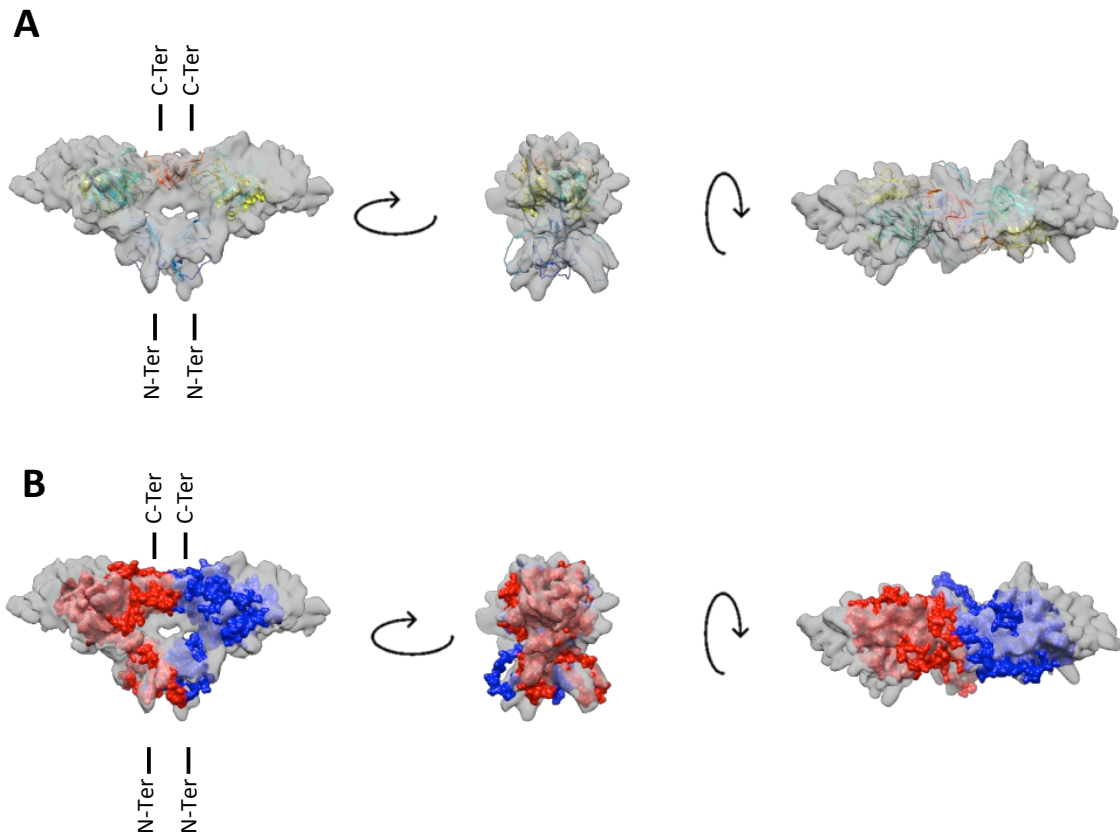

**Supplementary Figure 3: Overview of CT5B base.** The independently refined C2 base of CT5B with vWFD models sequentially fitted within the domains showing the location of the N- and C-termini. (A) Models with the rainbow clearly showing the N- and C-termini. (B) Ribbon representation of each domain colour coded red and blue and surface representation to also show the total occupied space.

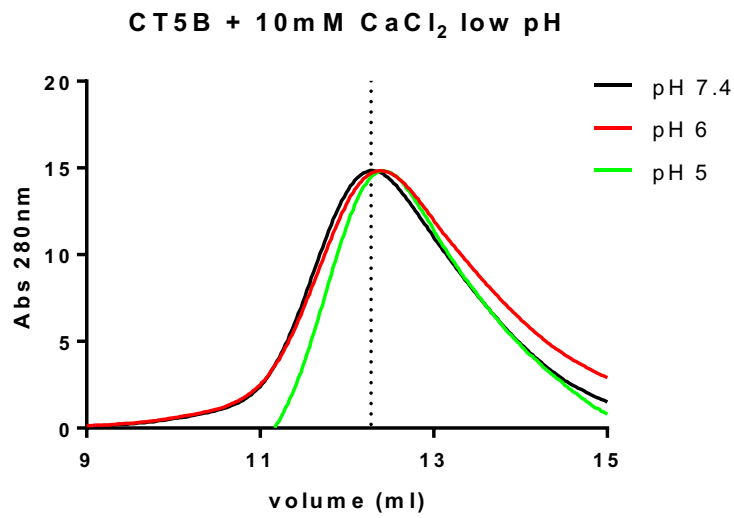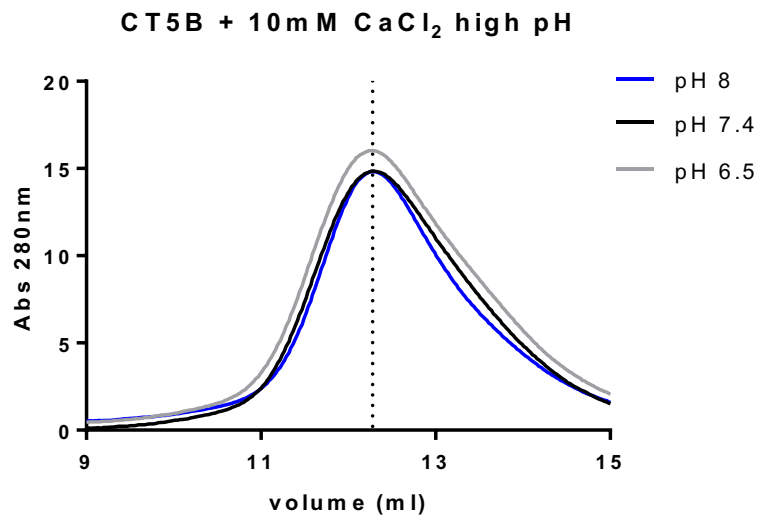

**Supplementary Figure 4: Gel filtration analysis of CT5B at different pH.**

CT5B was incubated in 10 mM CaCl<sub>2</sub> in different pH buffers, and then analyzed by gel filtration on a Superose 6 10/300 GL column. This experiment was performed once.

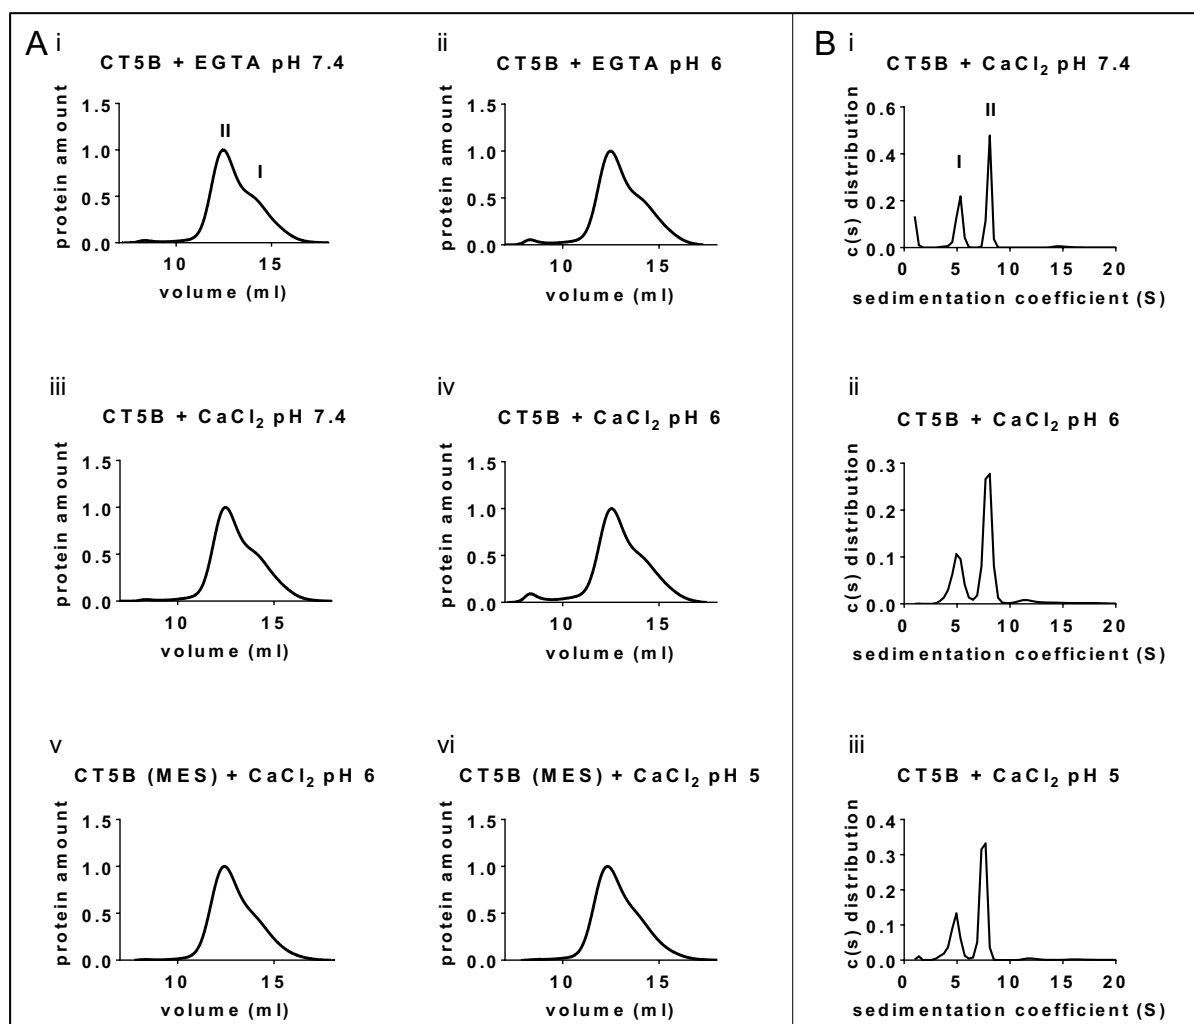

**Supplementary Figure 5. Biophysical analysis of MUC5B dimerization domain in the presence and absence of calcium.**

Recombinant CT5B was incubated with HBS 5 mM EGTA at pH 7.4 (Ai) and pH 6 (Aii), HBS 5 mM CaCl<sub>2</sub> at pH 7.4 (Aiii) and pH 6 (Aiv), MES 5 mM CaCl<sub>2</sub> at pH 6 (Av) and pH 5 (Avi) and analyzed by SEC-MALS. Representative graphs show the differential refractive index. CT5B showed two peaks corresponding to the dimer (peak II) and monomer (peak I). Recombinant CT5B was incubated with 5 mM CaCl<sub>2</sub> overnight at pH 7.4 (Bi), pH 6 (Bii) and pH 5 (Biii) and analyzed by AUC. CT5B showed two peaks corresponding to the dimer (peak II) and monomer (peak I). Experiments were repeated twice.
